# Supplementary material for: Highly selective bisphenol A—imprinted polymers prepared by atom transfer radical polymerization
Source: Royal Society of Chemistry journal article supplement (doi:10.1039/c0py00140f), 2010-01-01

## Electronic Supplementary Information

### Highly Selective Bisphenol A-Imprinted Polymers Prepared by Atom Transfer Radical Polymerization

Shogo Sasaki, Tooru Ooya and Toshifumi Takeuchi

*Graduate School of Engineering, Kobe University, 1-1 Rokkodai-cho, Nada-ku, Kobe 657-8501, Japan. Tel/Fax: +81788036158; E-mail: Takeuchi@gold.kobe-u.ac.jp*

An equilibrium binding constant of MIP-ATRP-2.4/0.8 for MIPs toward BPA was calculated to be  $1.3 \times 10^3 \text{ M}^{-1}$  via a Langmuir plot, where  $C_{eq}$ : free BPA (mol/L), A: bound BPA (mol/g), K: binding constant ( $\text{M}^{-1}$ ), and S: binding sites in the polymer (mol/g).

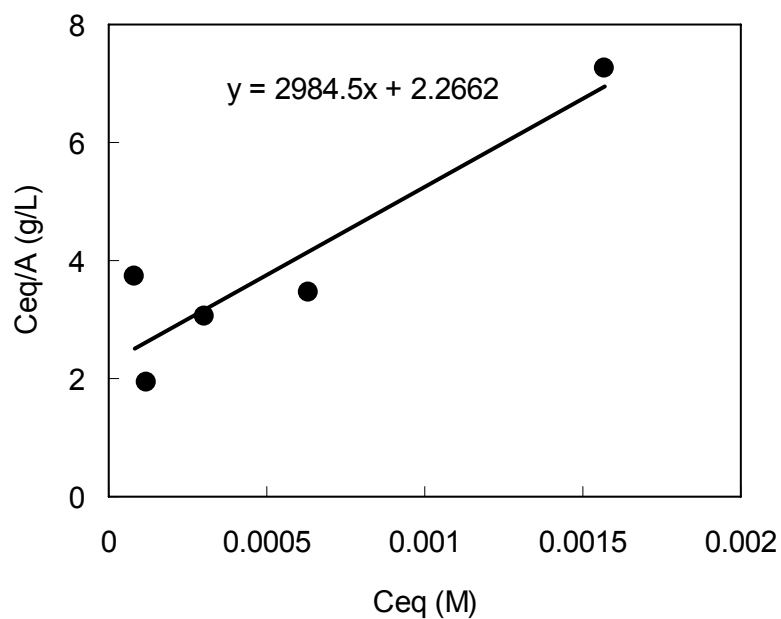

Supplement: c0py00140f.pdf [file c0py00140f.pdf]
